# Supplementary material for: Long-Term Outcomes and Prognostic Factors in Advanced Gallbladder Cancer: Focus on the Advanced T Stage
Source: PLoS One. 2016 Nov 15;11(11):e0166361. doi: 10.1371/journal.pone.0166361 (PMC5112857; doi:10.1371/journal.pone.0166361)
Supplement: S1 Table — (XLSX) [file pone.0166361.s001.xlsx]

## Sheet: advanced GBC
ID	jaundice	liver invasion	sex	survival state	survival time	date of surgery	TNM	surgery method	curative intent resection	margin	CBD resection	T	N	M	pathological differentiation	pathological type	intraoperative blood loss	Age	UGC	UGC diagnosis in other hosptial	CEA	CA125	CA199	hypertension	diabetes	Blood type	ascites	tumor location	cholecystolithiasis	Right epigastralgia	epigastric lump
0000730506	0	1	1	1	2.33333	2009-03-04	T4N2M0	13	0	2	x	4	2	0	2	1	0	66	0	#NULL!	1	#NULL!	#NULL!	1	0	#NULL!	1	#NULL!	0	1	#NULL!
0000668359	0	1	2	1	4.33333	2008-02-29	T4N2M0	13	0	2	x	4	2	0	3	2	0	38	0	#NULL!	2	1	1	0	0	#NULL!	0	#NULL!	0	0	#NULL!
0000714471	1	1	2	1	12.1667	2008-11-18	T4N1M0	9	0	2	x	4	1	0	2	1	0	58	0	#NULL!	2	2	1	0	0	#NULL!	0	#NULL!	1	1	#NULL!
0000680280	0	0	1	0	77.1	2008-05-12	T3N0M0	8	0	2	x	3	0	0	2	1	0	51	1	1	#NULL!	#NULL!	#NULL!	0	0	#NULL!	0	#NULL!	1	1	#NULL!
0000763792	0	0	1	1	20	2009-08-14	T3N0M0	7	1	0	0	3	0	0	2	1	0	72	1	0	#NULL!	#NULL!	#NULL!	1	0	#NULL!	0	#NULL!	1	0	#NULL!
0000814330	0	1	2	1	1	2010-04-30	T3N2M0	2	1	0	0	3	2	0	2	1	0	60	0	#NULL!	1	1	1	0	0	4	1	#NULL!	0	1	#NULL!
0000931712	0	1	2	1	3.06667	2011-12-08	T4N2M1	12	0	2	x	4	2	1	2	2	0	65	0	#NULL!	1	1	1	1	0	4	1	#NULL!	0	0	#NULL!
0000915362	1	1	1	1	1	2011-09-21	T4N2M1	11	0	2	x	4	2	1	2	1	0	65	0	#NULL!	1	1	1	0	0	4	1	#NULL!	0	1	#NULL!
0000710359	0	1	1	1	3	2008-10-27	T4N2M0	8	0	2	x	4	2	0	3	1	0	72	0	#NULL!	1	1	1	0	0	4	1	#NULL!	0	0	#NULL!
0000993911	0	1	2	1	1	2012-08-20	T4N1M0	13	0	2	x	4	1	0	3	1	0	60	0	#NULL!	2	2	1	0	0	4	1	#NULL!	0	0	#NULL!
0000932698	0	1	1	1	0.5	2011-12-09	T4N1M0	8	0	2	x	4	1	0	3	1	1	78	0	#NULL!	2	2	1	1	0	4	1	#NULL!	0	1	#NULL!
0000964037	1	1	2	1	6.16667	2012-04-25	T4N2M1	9	0	2	x	4	2	1	2	1	0	68	0	#NULL!	#NULL!	1	1	0	0	4	1	#NULL!	1	0	#NULL!
0000906130	1	1	2	1	5.5	2011-08-12	T3N1M1	9	0	2	x	3	1	1	2	1	0	46	0	#NULL!	#NULL!	2	1	0	0	4	1	#NULL!	1	0	#NULL!
0000918640	0	1	1	1	1	2011-10-13	T4N1M1	12	0	2	x	4	1	1	3	2	0	78	0	#NULL!	2	1	2	0	0	4	1	#NULL!	1	1	#NULL!
0000833152	0	1	2	1	2.66667	2010-08-09	T3N2M1	9	0	2	x	3	2	1	3	1	0	71	0	#NULL!	2	2	2	0	0	4	1	#NULL!	1	1	#NULL!
0000711874	0	1	2	1	1	2008-11-06	T3N2M1	12	0	2	x	3	2	1	3	1	0	54	0	#NULL!	#NULL!	#NULL!	#NULL!	0	0	4	1	#NULL!	0	1	1
0000697894	0	1	2	1	1	2008-08-18	T4N2M1	11	0	2	x	4	2	1	3	1	0	67	0	#NULL!	#NULL!	#NULL!	#NULL!	0	0	4	1	#NULL!	1	1	1
0000894102	0	1	1	1	11.6667	2011-06-16	T3N2M0	4	1	0	0	3	2	0	3	1	0	38	0	#NULL!	1	1	1	0	0	4	0	#NULL!	1	1	#NULL!
0000967692	1	0	2	1	4.83333	2012-05-07	T3N0M0	1	1	0	1	3	0	0	3	2	0	64	0	#NULL!	1	2	1	0	0	4	0	#NULL!	1	1	#NULL!
0000673867	0	1	1	1	1.33333	2008-04-09	T4N1M1	8	0	2	x	4	1	1	3	1	0	64	0	#NULL!	1	2	1	0	0	4	0	#NULL!	1	1	#NULL!
0000795876	0	1	1	1	1.16667	2010-01-07	T4N2M0	11	0	2	x	4	2	0	2	1	0	84	0	#NULL!	2	1	1	1	1	4	0	#NULL!	1	1	#NULL!
0000706526	1	1	2	1	8	2008-10-09	T4N1M0	11	0	2	x	4	1	0	2	1	0	51	0	#NULL!	2	1	1	0	0	4	0	#NULL!	0	1	#NULL!
0000956582	0	0	1	1	2.5	2012-03-30	T3N2M0	9	0	2	x	3	2	0	2	1	0	75	0	#NULL!	2	2	1	1	0	4	0	#NULL!	1	1	#NULL!
0000962737	1	1	2	0	30.0667	2012-04-13	T4N2M0	9	0	2	x	4	2	0	2	1	0	70	0	#NULL!	2	2	1	1	1	4	0	#NULL!	1	1	#NULL!
0000837471	1	0	2	1	0.666667	2010-08-31	T3N2M1	9	0	2	x	3	2	1	2	1	0	61	0	#NULL!	2	1	1	0	0	4	0	#NULL!	1	1	#NULL!
0000869666	0	0	2	1	14	2008-02-21	T3N1M0	1	1	1	0	3	1	0	3	1	0	60	0	#NULL!	1	1	2	0	0	4	0	#NULL!	1	1	#NULL!
0000971844	0	1	2	1	3.5	2012-05-22	T3N2M1	9	0	2	x	3	2	1	3	2	0	63	0	#NULL!	1	1	2	0	0	4	0	#NULL!	0	1	#NULL!
0000826987	0	1	1	1	32	2010-07-15	T4N1M0	5	1	0	1	4	1	0	2	1	0	37	1	1	2	#NULL!	2	0	0	4	0	#NULL!	1	1	#NULL!
0001025408	0	0	2	0	22.0667	2012-12-13	T3N1M0	3	1	0	1	3	1	0	2	1	0	61	1	1	2	1	2	0	0	4	0	#NULL!	1	1	#NULL!
0000914746	0	0	2	0	36.8333	2011-09-20	T3N0M0	2	1	0	0	3	0	0	2	1	0	55	1	1	2	1	2	0	0	4	0	#NULL!	1	1	#NULL!
0000883774	0	0	2	0	41.3	2011-05-06	T3N0M0	1	1	0	0	3	0	0	3	1	0	66	0	#NULL!	2	2	2	0	0	4	0	#NULL!	1	1	#NULL!
0000705898	0	1	2	1	2.33333	2008-09-29	T3N2M1	12	0	2	x	3	2	1	2	1	0	57	0	#NULL!	2	1	2	0	0	4	0	#NULL!	0	1	#NULL!
0000932475	0	1	1	1	7	2011-12-12	T3N1M0	7	1	0	1	3	1	0	3	1	0	64	0	#NULL!	2	2	2	0	0	4	0	#NULL!	0	1	#NULL!
0000974276	0	0	2	1	7	2012-05-25	T3N2M0	4	1	0	0	3	1	0	2	1	0	63	1	1	2	1	2	0	0	4	0	#NULL!	1	1	#NULL!
0000951905	1	0	2	1	1.33333	2008-03-08	T3N1M0	1	1	1	0	3	1	0	3	1	0	56	0	#NULL!	1	#NULL!	#NULL!	0	0	4	0	#NULL!	1	1	#NULL!
0000896141	0	1	2	1	1.16667	2011-07-01	T4N2M1	11	0	2	x	4	2	1	2	1	0	65	0	#NULL!	1	#NULL!	#NULL!	0	0	4	0	#NULL!	0	0	#NULL!
0000915259	1	1	2	1	9	2011-09-26	T3N2M0	4	1	0	1	3	2	0	2	1	0	60	0	#NULL!	1	#NULL!	#NULL!	1	1	4	0	#NULL!	1	1	#NULL!
0000971685	0	0	1	0	28.9	2012-05-18	T3N0M0	3	1	0	0	3	0	0	2	1	0	37	1	1	2	#NULL!	#NULL!	0	0	4	0	#NULL!	1	1	#NULL!
0000883192	0	0	2	0	41.5333	2011-04-29	T3N0M0	1	1	0	0	3	0	0	3	1	0	52	1	1	2	#NULL!	#NULL!	0	0	4	0	#NULL!	0	1	#NULL!
0000847101	0	0	1	1	2.5	2010-10-29	T3N1M1	9	0	2	x	3	1	1	3	1	0	83	0	#NULL!	2	#NULL!	#NULL!	1	0	4	0	#NULL!	1	0	#NULL!
0000962838	0	0	1	0	29.8667	2012-04-19	T3N1M0	1	1	0	0	3	1	0	1	1	0	62	0	#NULL!	#NULL!	#NULL!	#NULL!	0	0	4	0	#NULL!	1	1	#NULL!
0000827020	0	0	2	0	51.4333	2010-07-02	T3N0M0	1	1	0	1	3	0	0	1	1	0	56	1	1	#NULL!	#NULL!	#NULL!	0	1	4	0	#NULL!	1	1	#NULL!
0000873278	1	1	2	1	9	2011-03-14	T4N1M0	9	0	2	x	4	1	0	3	1	0	53	0	#NULL!	#NULL!	#NULL!	#NULL!	0	0	4	0	#NULL!	0	1	#NULL!
0000825092	0	0	2	1	2	2010-07-01	T3N1M1	8	0	2	x	3	1	1	3	1	0	65	0	#NULL!	#NULL!	1	1	0	0	3	1	#NULL!	1	1	#NULL!
0000734143	0	1	2	1	2	2009-03-16	T4N1M1	8	0	2	x	4	1	1	2	2	0	61	1	1	2	2	2	0	0	3	1	#NULL!	0	1	#NULL!
0000845920	0	1	1	1	4.66667	2010-11-08	T4N1M0	9	0	2	x	4	1	0	2	1	0	68	0	#NULL!	1	#NULL!	#NULL!	0	0	3	1	#NULL!	1	1	#NULL!
0000855324	0	1	2	1	3	2010-12-13	T4N1M0	11	0	2	x	4	1	0	1	1	0	73	0	#NULL!	1	1	1	0	0	3	0	#NULL!	1	0	0
0000961770	0	0	2	0	30.1333	2012-04-11	T3N0M0	1	1	0	0	3	0	0	2	1	0	48	1	1	2	1	2	0	0	3	0	#NULL!	0	1	#NULL!
0000779739	0	1	2	1	2	2009-11-09	T4N2M1	12	0	2	x	4	2	1	3	1	0	51	0	#NULL!	#NULL!	#NULL!	#NULL!	0	0	3	0	#NULL!	0	1	#NULL!
0000665196	0	1	2	1	2.66667	2008-02-27	T4N1M0	9	0	2	x	4	1	0	3	1	0	70	0	#NULL!	#NULL!	#NULL!	#NULL!	1	0	3	0	#NULL!	1	1	#NULL!
0001007991	0	1	2	1	4.33333	2012-10-22	T3N2M0	9	0	2	x	3	2	0	3	1	0	51	0	#NULL!	#NULL!	#NULL!	#NULL!	0	0	3	0	#NULL!	1	1	#NULL!
0000946925	0	0	2	1	15	2012-02-15	T3N0M0	8	0	2	x	3	1	0	1	1	0	84	0	#NULL!	#NULL!	#NULL!	#NULL!	0	0	3	0	#NULL!	1	1	#NULL!
0000744710	0	0	2	1	10	2009-05-11	T3N1M1	8	0	2	x	3	1	1	1	1	0	73	0	#NULL!	#NULL!	#NULL!	#NULL!	0	0	3	0	#NULL!	1	1	#NULL!
0000797845	0	1	2	1	1	2010-02-10	T3N2M1	12	0	2	x	3	2	1	3	1	0	69	0	#NULL!	1	1	1	1	0	2	1	#NULL!	1	1	#NULL!
0000675553	0	1	1	1	1.33333	2008-04-22	T4N2M1	11	0	2	x	4	2	1	3	1	0	59	0	#NULL!	1	1	1	0	0	2	1	#NULL!	0	0	#NULL!
0000993434	0	1	1	1	1	2012-08-15	T4N1M1	8	0	2	x	4	1	1	3	1	0	71	0	#NULL!	1	#NULL!	1	0	0	2	1	#NULL!	1	1	#NULL!
0000885338	1	1	2	1	1.66667	2011-04-20	T3N2M1	9	0	2	x	3	2	1	3	1	0	44	0	#NULL!	2	1	1	0	0	2	1	#NULL!	1	0	#NULL!
0000932372	0	1	1	1	10	2011-12-07	T4N1M1	8	0	2	x	4	1	1	2	1	1	63	0	#NULL!	2	1	1	1	0	2	1	#NULL!	0	1	#NULL!
0000857230	1	1	1	1	1	2010-12-16	T4N2M1	11	0	2	x	4	2	1	3	1	0	58	0	#NULL!	2	1	2	0	0	2	1	#NULL!	0	0	#NULL!
0000924110	0	1	2	1	1.33333	2011-11-02	T4N2M1	11	0	2	x	4	2	1	3	1	0	57	0	#NULL!	2	1	2	0	0	2	1	#NULL!	0	0	#NULL!
0000977772	1	1	2	1	2	2012-07-03	T4N2M0	11	0	2	x	4	1	0	3	1	0	51	0	#NULL!	1	1	#NULL!	0	0	2	1	#NULL!	1	1	#NULL!
0000855718	0	1	2	1	1.6	2010-12-09	T4N2M0	5	1	0	1	4	2	0	3	1	1	68	0	#NULL!	#NULL!	#NULL!	#NULL!	0	0	2	1	#NULL!	0	1	#NULL!
0000735890	0	0	2	1	7	2009-03-19	T3N1M0	2	1	0	0	3	1	0	3	1	0	71	1	1	#NULL!	#NULL!	#NULL!	0	0	2	1	#NULL!	1	1	#NULL!
0000762039	0	1	2	1	1.33333	2009-08-07	T4N2M1	12	0	2	x	4	2	1	3	1	0	60	0	#NULL!	#NULL!	#NULL!	#NULL!	0	0	2	1	#NULL!	1	1	#NULL!
0000839842	1	1	1	1	1	2010-09-16	T4N2M1	9	0	2	x	4	2	1	3	1	0	57	0	#NULL!	#NULL!	#NULL!	#NULL!	0	0	2	1	#NULL!	1	1	#NULL!
0000732197	0	0	1	1	3	2009-02-27	T4N1M0	8	0	2	x	3	1	0	3	1	0	67	0	#NULL!	#NULL!	#NULL!	#NULL!	1	0	2	1	#NULL!	1	1	#NULL!
0000815873	0	1	2	1	0.5	2010-05-14	T4N2M1	12	0	2	x	4	2	1	3	1	0	61	0	#NULL!	1	#NULL!	1	0	0	2	0	#NULL!	1	1	#NULL!
0000671057	0	1	1	1	1.2	2008-03-20	T3N1M1	11	0	2	x	3	1	1	3	1	0	61	0	#NULL!	1	1	1	0	0	2	0	#NULL!	1	0	#NULL!
0000869585	1	0	1	1	10	2011-02-22	T3N2M0	9	0	2	x	3	2	0	2	2	0	78	0	#NULL!	1	1	1	1	1	2	0	#NULL!	0	0	#NULL!
0000935403	1	0	2	1	12.5	2011-12-21	T3N1M0	4	1	0	1	3	1	0	3	1	0	74	0	#NULL!	1	#NULL!	1	0	0	2	0	#NULL!	1	1	#NULL!
0000992739	1	1	2	1	5	2012-08-15	T4N1M0	5	1	0	1	4	1	0	2	1	1	65	0	#NULL!	2	#NULL!	1	0	0	2	0	#NULL!	0	0	#NULL!
0000875492	1	0	2	1	4	2011-03-21	T3N1M0	1	1	0	1	3	1	0	3	2	0	51	1	1	2	#NULL!	1	0	0	2	0	#NULL!	1	0	#NULL!
0000801696	0	1	1	1	5	2010-03-11	T4N2M0	11	0	2	x	4	2	0	1	1	0	68	0	#NULL!	2	2	1	0	0	2	0	#NULL!	1	1	#NULL!
0000913651	1	1	2	1	2	2011-09-20	T4N1M1	11	0	2	x	4	1	1	2	1	0	62	1	1	2	1	1	1	0	2	0	#NULL!	1	1	#NULL!
0000929650	0	1	1	1	5.33333	2011-12-05	T4N1M0	10	0	2	x	4	1	0	2	1	0	58	0	#NULL!	2	#NULL!	1	0	0	2	0	#NULL!	1	0	#NULL!
0000893531	1	1	1	1	1.33333	2011-06-13	T4N2M0	9	0	2	x	4	2	0	3	1	0	76	0	#NULL!	2	1	1	1	0	2	0	#NULL!	1	1	#NULL!
0000936492	1	1	1	1	9	2011-12-29	T4N1M0	9	0	2	x	4	1	0	3	1	0	63	0	#NULL!	2	2	1	0	0	2	0	#NULL!	0	0	#NULL!
0000979806	0	1	1	1	2.33333	2012-06-12	T4N1M1	9	0	2	x	4	1	1	2	1	0	71	0	#NULL!	2	1	1	0	0	2	0	#NULL!	1	0	#NULL!
0000877435	0	1	1	1	1.5	2011-03-31	T4N2M1	8	0	2	x	4	2	1	3	2	0	50	0	#NULL!	2	#NULL!	1	0	0	2	0	#NULL!	1	1	#NULL!
0000891971	0	1	2	1	2.33333	2011-06-09	T4N2M0	8	0	2	x	4	2	0	3	1	0	70	0	#NULL!	2	2	1	0	0	2	0	#NULL!	1	1	1
0000876965	0	1	2	1	18.8333	2011-03-29	T3N1M1	11	0	2	x	3	1	1	3	1	0	60	0	#NULL!	1	1	2	0	0	2	0	#NULL!	0	1	#NULL!
0000845240	0	1	2	1	6	2010-11-02	T3N2M0	9	0	2	x	3	2	0	2	1	0	48	0	#NULL!	1	2	2	0	0	2	0	#NULL!	0	0	#NULL!
0000902369	0	0	2	1	22	2011-07-21	T3N0M0	3	1	0	1	3	0	0	1	1	0	50	1	1	2	2	2	0	0	2	0	#NULL!	1	1	#NULL!
0000913530	0	0	2	0	37.2333	2011-09-08	T3N0M0	3	1	1	0	3	0	0	2	1	0	82	1	0	2	2	2	0	1	2	0	#NULL!	1	1	#NULL!
0000908835	0	0	2	0	37.7667	2011-08-22	T3N0M0	1	1	0	0	3	0	0	1	1	0	63	1	1	2	2	2	0	0	2	0	#NULL!	1	1	#NULL!
0000969437	1	1	2	0	29.1333	2012-05-11	T4N1M0	11	0	2	x	4	1	0	3	1	0	46	0	#NULL!	2	2	2	0	0	2	0	#NULL!	0	0	#NULL!
0000796810	0	1	2	1	2.33333	2010-01-20	T3N2M1	9	0	2	x	3	2	1	3	1	0	59	0	#NULL!	2	2	2	0	0	2	0	#NULL!	1	1	#NULL!
0000934164	0	1	2	1	3	2011-12-13	T3N2M1	9	0	2	x	3	2	1	3	1	0	64	0	#NULL!	2	1	2	0	0	2	0	#NULL!	1	1	#NULL!
0000919347	0	0	2	1	3	2011-11-01	T3N2M1	8	0	2	x	3	2	1	1	1	0	61	0	#NULL!	2	#NULL!	2	0	1	2	0	#NULL!	0	1	#NULL!
0000889733	0	1	2	1	3	2011-05-26	T4N2M0	8	0	2	x	4	2	0	2	2	0	78	0	#NULL!	1	#NULL!	#NULL!	0	0	2	0	#NULL!	1	1	1
0000895645	0	1	2	1	10	2011-06-28	T3N1M0	3	1	0	0	3	1	0	2	2	0	55	0	#NULL!	2	1	#NULL!	0	0	2	0	#NULL!	0	1	1
0000824103	0	1	2	1	3	2010-06-22	T4N2M0	5	1	0	1	4	2	0	2	1	0	72	1	1	#NULL!	#NULL!	#NULL!	1	0	2	0	#NULL!	1	1	#NULL!
0000846663	0	0	2	0	47.8	2010-10-21	T3N0M0	3	1	0	0	3	0	0	1	1	0	64	1	1	#NULL!	#NULL!	#NULL!	0	0	2	0	#NULL!	1	1	#NULL!
0000896643	1	1	2	0	39.6	2011-06-27	T3N1M0	1	1	0	1	3	1	0	2	1	0	65	0	#NULL!	#NULL!	#NULL!	#NULL!	0	0	2	0	#NULL!	0	0	#NULL!
0000751766	0	0	2	1	42.6	2009-06-11	T3N0M0	1	1	0	0	3	0	0	2	1	0	62	1	1	#NULL!	#NULL!	#NULL!	0	0	2	0	#NULL!	1	1	#NULL!
0000664950	0	0	2	1	7	2008-03-03	T3N1M1	13	0	2	x	3	1	1	1	1	0	55	1	1	#NULL!	#NULL!	#NULL!	1	0	2	0	#NULL!	1	1	#NULL!
0000816061	0	1	2	1	2	2010-05-07	T4N1M0	11	0	2	x	4	1	0	3	1	0	65	0	#NULL!	#NULL!	#NULL!	#NULL!	0	0	2	0	#NULL!	1	1	#NULL!
0000815158	1	1	1	1	1	2010-05-06	T4N1M0	9	0	2	x	4	1	0	2	1	0	51	0	#NULL!	#NULL!	#NULL!	#NULL!	0	0	2	0	#NULL!	0	1	#NULL!
0000760744	0	1	2	1	3	2009-07-29	T4N1M1	9	0	2	x	4	1	1	3	1	0	41	0	#NULL!	#NULL!	#NULL!	#NULL!	0	0	2	0	#NULL!	1	1	#NULL!
0000968984	0	1	1	1	3.66667	2012-05-07	T4N1M0	8	0	2	x	4	1	0	3	1	0	66	0	#NULL!	#NULL!	#NULL!	#NULL!	0	0	2	0	#NULL!	0	0	#NULL!
0000737637	0	1	1	1	23.3333	2009-03-30	T3N0M0	8	0	2	x	3	0	0	2	1	0	51	1	0	#NULL!	#NULL!	#NULL!	0	0	2	0	#NULL!	1	1	#NULL!
0000865133	0	0	2	1	9	2008-02-10	T3N1M0	7	1	1	0	3	1	0	3	1	0	71	1	0	#NULL!	#NULL!	#NULL!	0	0	2	0	#NULL!	1	1	#NULL!
0000825451	0	1	2	1	6	2010-06-28	T3N2M0	4	1	0	1	3	2	0	2	1	1	64	0	#NULL!	#NULL!	#NULL!	#NULL!	0	0	2	0	#NULL!	1	1	#NULL!
0001028648	0	1	2	1	1.66667	2012-12-27	T4N1M1	12	0	2	x	4	1	1	2	1	0	67	0	#NULL!	1	1	1	0	0	1	1	#NULL!	1	1	#NULL!
0000828895	0	1	2	1	0.233333	2010-07-21	T3N1M1	12	0	2	x	3	1	1	3	1	0	60	0	#NULL!	1	1	1	0	0	1	1	#NULL!	1	1	1
0000873135	0	1	2	1	0.5	2011-03-16	T3N2M1	12	0	2	x	3	2	1	3	1	0	71	0	#NULL!	1	#NULL!	1	0	0	1	1	#NULL!	1	1	#NULL!
0000956553	1	1	2	1	2.66667	2012-03-29	T4N2M0	11	0	2	x	4	2	0	3	1	0	49	0	#NULL!	1	1	1	0	0	1	1	#NULL!	1	0	1
0000650337	0	1	2	1	1.66667	2007-12-25	T4N2M0	13	0	2	x	4	2	0	2	2	0	62	0	#NULL!	2	1	1	0	0	1	1	#NULL!	1	0	#NULL!
0000959413	0	1	2	1	1.33333	2012-04-05	T4N1M1	12	0	2	x	4	1	1	3	1	0	50	0	#NULL!	2	1	1	0	0	1	1	#NULL!	1	1	#NULL!
0001014386	1	1	2	1	3	2012-11-20	T4N1M0	9	0	2	x	4	1	0	3	1	0	79	0	#NULL!	#NULL!	2	1	0	0	1	1	#NULL!	0	1	#NULL!
0000843918	0	0	1	1	2	2009-09-30	T3N2M0	2	1	1	0	3	2	0	2	1	0	65	1	1	1	1	2	0	0	1	1	#NULL!	0	1	#NULL!
0000860262	0	0	1	1	0.666667	2011-01-13	T3N2M1	8	0	2	x	3	2	1	3	1	0	64	0	#NULL!	1	#NULL!	2	0	0	1	1	#NULL!	0	0	#NULL!
0001006862	0	1	1	1	2	2012-10-12	T3N0M0	1	1	0	1	3	0	0	3	2	0	68	0	#NULL!	2	1	2	1	0	1	1	#NULL!	0	1	#NULL!
0000970935	0	1	2	1	1.33333	2012-05-24	T4N2M1	12	0	2	x	4	2	1	3	1	0	50	0	#NULL!	2	1	2	0	0	1	1	#NULL!	0	1	1
0000779906	1	1	2	1	1	2009-11-10	T4N2M0	9	0	2	x	4	2	0	3	1	0	66	0	#NULL!	#NULL!	#NULL!	#NULL!	1	0	1	1	#NULL!	1	1	#NULL!
0000785681	0	0	2	1	2.33333	2009-12-10	T3N2M1	8	0	2	x	3	2	1	3	1	0	55	0	#NULL!	#NULL!	#NULL!	#NULL!	0	0	1	1	#NULL!	1	1	#NULL!
0000761303	0	1	2	1	4	2009-07-30	T3N2M1	8	0	2	x	3	2	1	2	2	0	45	0	#NULL!	#NULL!	#NULL!	#NULL!	1	0	1	1	#NULL!	1	1	#NULL!
0000924765	0	1	2	1	0.3	2011-11-10	T3N1M1	8	0	2	x	3	1	1	1	1	0	61	0	#NULL!	#NULL!	#NULL!	#NULL!	1	0	1	1	#NULL!	1	1	1
0000908688	0	1	1	1	6	2011-08-23	T4N1M1	8	0	2	x	4	1	1	3	1	0	56	0	#NULL!	1	2	1	0	0	1	0	#NULL!	0	1	#NULL!
0000970736	0	0	2	1	1	2012-05-18	T3N2M0	2	1	0	0	3	2	0	2	1	0	63	0	#NULL!	2	2	1	0	0	1	0	#NULL!	1	0	#NULL!
0000702854	0	1	2	1	2	2008-09-18	T4N1M1	11	0	2	x	4	1	1	2	1	0	60	1	1	2	2	1	0	0	1	0	#NULL!	0	1	#NULL!
0000869590	1	1	1	1	3	2011-02-22	T4N2M1	9	0	2	x	4	2	1	2	1	0	66	0	#NULL!	2	1	1	0	0	1	0	#NULL!	0	1	#NULL!
0000672801	0	1	2	1	4	2008-03-31	T4N1M1	9	0	2	x	4	1	1	2	1	0	46	0	#NULL!	2	1	1	0	0	1	0	#NULL!	0	0	#NULL!
0000792070	1	0	2	1	4	2010-01-18	T3N2M1	9	0	2	x	3	2	1	2	1	0	81	0	#NULL!	2	2	1	0	0	1	0	#NULL!	1	1	#NULL!
0000965523	0	1	2	1	9.16667	2012-05-16	T4N2M0	8	0	2	x	4	2	0	2	1	1	76	0	#NULL!	2	#NULL!	1	0	0	1	0	#NULL!	1	1	#NULL!
0000671555	0	1	1	1	3.33333	2008-03-20	T4N1M0	8	0	2	x	4	1	0	2	2	0	65	0	#NULL!	1	1	2	0	0	1	0	#NULL!	0	0	#NULL!
0000861013	0	1	2	1	19	2011-01-13	T3N2M0	4	1	0	0	3	2	0	2	1	1	70	0	#NULL!	2	#NULL!	2	1	0	1	0	#NULL!	1	1	#NULL!
0000871965	0	0	2	0	43.2333	2011-03-08	T3N0M0	1	1	0	1	3	0	0	2	1	0	55	0	#NULL!	2	2	2	0	0	1	0	#NULL!	1	0	#NULL!
0000882382	0	0	2	1	44.3333	2011-04-25	T3N0M0	1	1	0	0	3	0	0	1	1	0	62	1	1	2	2	2	0	0	1	0	#NULL!	1	1	#NULL!
0001018173	0	0	2	0	22.6	2012-11-27	T3N0M0	1	1	0	0	3	0	0	2	1	1	73	1	1	2	2	2	0	0	1	0	#NULL!	1	1	#NULL!
0000978562	0	1	2	1	3	2012-07-24	T4N1M1	10	0	2	x	4	1	1	3	2	0	51	0	#NULL!	1	2	#NULL!	0	0	1	0	#NULL!	1	1	#NULL!
0000884605	1	1	2	1	2	2011-04-15	T4N2M0	11	0	2	x	4	2	0	3	1	0	63	0	#NULL!	2	#NULL!	#NULL!	0	0	1	0	#NULL!	0	1	#NULL!
0000872793	0	1	1	1	11.6667	2011-03-11	T4N1M0	5	1	0	1	4	1	0	3	2	1	65	0	#NULL!	#NULL!	#NULL!	#NULL!	0	0	1	0	#NULL!	0	0	#NULL!
0000905689	0	0	2	0	38.3333	2011-08-05	T3N0M0	3	1	0	0	3	0	0	2	1	0	59	1	1	#NULL!	#NULL!	#NULL!	1	0	1	0	#NULL!	1	1	#NULL!
0000748520	0	0	2	1	6	2009-05-20	T3N2M0	2	1	0	0	3	2	0	3	1	0	62	1	1	#NULL!	#NULL!	#NULL!	0	0	1	0	#NULL!	1	1	#NULL!
0000938665	0	0	1	0	33.3	2012-01-06	T3N0M0	1	1	0	1	3	0	0	2	1	0	69	0	#NULL!	#NULL!	#NULL!	#NULL!	0	0	1	0	#NULL!	0	1	#NULL!
0000948528	0	0	2	1	4	2012-02-17	T3N1M0	1	1	0	0	3	1	0	3	1	0	39	1	1	#NULL!	#NULL!	#NULL!	0	0	1	0	#NULL!	1	1	#NULL!
0000711127	0	1	2	1	1	2008-11-03	T4N2M1	13	0	2	x	4	2	1	3	1	0	75	0	#NULL!	#NULL!	#NULL!	#NULL!	0	0	1	0	#NULL!	0	1	0
0000954445	0	1	2	1	14	2012-03-15	T4N1M0	11	0	2	x	4	1	0	2	1	0	49	1	0	#NULL!	#NULL!	#NULL!	0	0	1	0	#NULL!	0	0	#NULL!
0000786219	1	1	2	1	2	2009-12-08	T4N1M0	9	0	2	x	4	1	0	3	1	0	72	0	#NULL!	#NULL!	#NULL!	#NULL!	0	0	1	0	#NULL!	1	0	#NULL!
0000950513	0	1	2	1	1	2012-03-08	T4N1M1	9	0	2	x	4	1	1	3	1	0	70	0	#NULL!	#NULL!	#NULL!	#NULL!	1	1	1	0	#NULL!	0	1	#NULL!
0000737614	0	1	2	1	38	2009-03-31	T4N0M0	9	0	2	x	4	0	0	3	1	0	65	1	1	#NULL!	#NULL!	#NULL!	0	0	1	0	#NULL!	1	1	#NULL!
0000968181	0	0	2	1	5.66667	2012-05-04	T3N2M0	4	1	0	0	3	2	0	3	1	0	63	1	1	#NULL!	#NULL!	#NULL!	1	1	1	0	#NULL!	1	1	#NULL!
0001003873	1	1	2	1	3	2012-09-29	T4N1M0	9	0	2	x	4	1	0	3	2	0	66	0	#NULL!	2	2	1	0	0	3	0	6	0	1	#NULL!
0001011353	0	0	2	0	23.4333	2012-11-02	T3N0M0	1	1	0	0	3	0	0	3	1	0	49	0	#NULL!	#NULL!	#NULL!	#NULL!	0	0	3	0	6	0	1	#NULL!
0000972038	1	1	2	1	2	2012-05-21	T4N1M0	10	0	2	x	4	1	0	3	1	0	67	0	#NULL!	1	1	1	0	0	2	0	6	0	0	#NULL!
0000881794	0	1	2	1	7.66667	2011-05-03	T3N2M0	2	1	0	0	3	2	0	2	1	0	57	0	#NULL!	2	1	1	0	0	2	0	6	0	1	#NULL!
0000793317	0	1	1	1	1.66667	2010-01-27	T4N2M0	9	0	2	x	4	2	0	3	2	0	51	0	#NULL!	#NULL!	#NULL!	#NULL!	0	0	2	0	6	1	0	#NULL!
0000843104	0	0	2	0	48	2010-10-15	T3N1M0	1	1	0	0	3	1	0	1	1	0	75	0	#NULL!	1	2	2	0	0	1	0	6	1	1	#NULL!
0000678967	0	0	2	1	4.33333	2008-05-06	T3N2M0	8	0	2	x	3	2	0	2	1	0	53	0	#NULL!	#NULL!	#NULL!	#NULL!	0	0	1	0	6	1	1	#NULL!
0000790680	1	0	2	1	7	2010-01-18	T3N1M0	7	1	0	1	3	1	0	3	1	0	78	0	#NULL!	1	1	1	0	1	1	1	5	0	0	#NULL!
0000873483	1	1	2	1	2.66667	2011-03-11	T4N1M0	9	0	2	x	4	1	0	2	1	0	75	0	#NULL!	2	2	1	0	0	4	1	4	0	1	#NULL!
0000877333	1	1	1	1	1.83333	2011-04-07	T4N2M1	9	0	2	x	4	2	1	3	2	1	53	0	#NULL!	1	#NULL!	2	0	0	4	1	4	0	1	1
0000909409	1	1	2	1	2.33333	2011-09-01	T4N1M1	9	0	2	x	4	1	1	2	1	0	81	0	#NULL!	1	1	1	0	0	4	0	4	1	1	#NULL!
0000916734	0	1	2	1	7	2011-10-09	T3N0M1	8	0	2	x	3	0	1	3	1	0	66	0	#NULL!	1	1	1	0	1	4	0	4	0	1	#NULL!
0001018719	0	1	1	1	2	2012-11-30	T4N2M0	8	0	2	x	4	2	0	3	1	0	66	0	#NULL!	2	2	2	0	0	4	0	4	0	1	#NULL!
0000782834	0	1	2	1	7	2009-11-19	T4N1M0	10	0	2	x	4	1	0	2	2	0	47	0	#NULL!	#NULL!	#NULL!	#NULL!	0	0	4	0	4	1	1	#NULL!
0000833615	1	1	2	1	7.53333	2010-08-10	T4N1M0	5	1	0	1	4	1	0	2	1	0	58	0	#NULL!	1	#NULL!	1	0	0	3	0	4	1	1	#NULL!
0000816460	0	0	2	1	1.33333	2010-05-11	T3N2M1	8	0	2	x	3	2	1	3	1	0	68	0	#NULL!	1	1	1	0	0	3	0	4	0	1	#NULL!
0000882156	0	1	1	1	4	2011-04-25	T3N0M0	3	1	0	0	3	0	0	3	1	0	66	0	#NULL!	#NULL!	#NULL!	2	0	0	3	0	4	1	1	#NULL!
0000851132	1	1	1	1	0.6	2010-11-22	T3N2M0	9	0	2	x	3	2	0	3	2	0	78	0	#NULL!	2	1	1	0	0	2	1	4	1	1	#NULL!
0000951518	0	1	2	1	12.3333	2012-03-13	T4N0M0	6	1	0	1	4	0	0	3	1	1	68	0	#NULL!	1	1	1	0	0	2	0	4	0	1	#NULL!
0000835256	0	1	2	1	9.33333	2010-08-19	T3N2M0	4	1	0	0	3	2	0	2	1	0	63	0	#NULL!	1	#NULL!	1	0	0	2	0	4	1	1	#NULL!
0000868913	0	1	2	1	1.66667	2011-02-28	T4N1M1	8	0	2	x	4	1	1	3	1	0	62	0	#NULL!	1	1	1	0	0	2	0	4	1	1	#NULL!
0000936542	0	0	2	0	33.6333	2011-12-26	T3N1M0	1	1	0	0	3	1	0	3	1	0	52	1	0	2	2	1	0	0	2	0	4	1	1	#NULL!
0000999726	0	1	1	1	3	2009-09-10	T3N1M0	1	1	1	0	3	1	0	3	2	0	73	0	#NULL!	2	1	2	0	0	2	0	4	0	1	#NULL!
0000860422	0	0	2	0	45.5667	2010-12-28	T3N0M0	1	1	0	0	3	0	0	2	1	0	71	0	#NULL!	2	2	2	1	1	2	0	4	0	0	#NULL!
0000857832	0	0	2	0	45.7667	2010-12-22	T3N0M0	1	1	0	0	3	0	0	2	1	0	77	0	#NULL!	2	2	2	1	0	2	0	4	1	1	#NULL!
0000964204	1	1	1	1	5	2012-04-20	T4N1M0	9	0	2	x	4	1	0	3	1	0	68	0	#NULL!	2	#NULL!	#NULL!	0	0	2	0	4	0	0	#NULL!
0000872056	0	1	2	1	1.66667	2011-03-09	T4N2M0	9	0	2	x	4	2	0	3	1	0	36	0	#NULL!	2	#NULL!	#NULL!	0	0	2	0	4	1	1	#NULL!
0000891769	0	1	1	0	40.2	2011-06-09	T3N0M0	8	0	2	x	3	0	0	1	1	1	61	0	#NULL!	2	#NULL!	#NULL!	1	0	2	0	4	1	1	#NULL!
0000757848	1	1	2	1	1	2009-07-08	T3N2M1	9	0	2	x	3	2	1	3	1	0	60	0	#NULL!	#NULL!	#NULL!	#NULL!	0	0	2	0	4	0	1	#NULL!
0001009851	0	0	1	1	1	2012-10-22	T3N2M1	9	0	2	x	3	2	1	3	1	0	67	0	#NULL!	1	2	1	0	0	1	1	4	1	1	#NULL!
0000764134	0	1	2	1	5	2009-08-17	T4N1M0	10	0	2	x	4	1	0	3	2	0	74	0	#NULL!	#NULL!	#NULL!	#NULL!	1	0	1	1	4	1	1	#NULL!
0000737311	1	1	2	1	8	2009-04-03	T4N1M0	9	0	2	x	4	1	0	2	1	0	60	0	#NULL!	1	1	1	0	0	1	0	4	1	1	#NULL!
0000968626	0	1	2	1	3.3	2012-05-14	T4N0M0	6	1	0	1	4	0	0	3	1	0	45	0	#NULL!	2	1	2	0	0	1	0	4	1	1	#NULL!
0000949911	0	1	1	1	5.33333	2012-03-01	T3N1M0	7	1	0	0	3	1	0	2	1	0	61	0	#NULL!	1	#NULL!	#NULL!	0	0	1	0	4	1	1	#NULL!
0000767266	0	1	2	1	5.66667	2009-08-28	T3N2M0	2	1	0	0	3	2	0	3	2	0	65	0	#NULL!	#NULL!	#NULL!	#NULL!	1	0	1	0	4	1	1	#NULL!
0000816837	0	0	2	0	52.9333	2010-05-17	T3N0M0	8	0	2	x	3	0	0	2	1	0	68	1	0	#NULL!	#NULL!	#NULL!	0	0	1	0	4	1	1	#NULL!
0000733662	1	0	2	1	5	2009-03-10	T3N2M0	9	0	2	x	3	2	0	2	1	0	58	0	#NULL!	#NULL!	#NULL!	#NULL!	0	0	#NULL!	1	3	0	1	#NULL!
0000798083	0	0	2	1	8	2010-02-10	T3N1MO	7	1	0	0	3	1	0	3	1	0	67	0	#NULL!	2	2	2	0	0	#NULL!	0	3	0	0	#NULL!
0000793614	0	0	2	0	56.6667	2010-01-25	T3N0M0	1	1	0	0	3	0	0	2	1	0	44	0	#NULL!	2	1	#NULL!	0	0	#NULL!	0	3	0	1	#NULL!
0000692426	0	0	2	0	74.9333	2008-07-17	T3N0M0	8	0	2	x	3	0	0	3	1	0	71	1	0	#NULL!	#NULL!	#NULL!	0	0	#NULL!	0	3	1	1	#NULL!
0000944931	0	0	1	0	32.3	2012-02-06	T3N0M0	3	1	0	0	3	0	0	2	1	0	78	0	#NULL!	2	1	1	0	0	4	1	3	1	1	#NULL!
0000972881	0	1	1	1	2.66667	2012-06-04	T4N2M1	9	0	2	x	4	2	1	2	1	0	55	0	#NULL!	2	2	1	0	0	4	0	3	0	1	#NULL!
0000741985	1	1	2	1	2	2009-04-22	T4N1M0	9	0	2	x	4	1	0	3	1	0	66	0	#NULL!	2	2	1	1	0	4	0	3	1	0	#NULL!
0000697932	1	1	2	1	0.666667	2008-08-18	T4N1M0	9	0	2	x	4	1	0	2	1	0	83	0	#NULL!	2	2	1	1	1	4	0	3	1	1	#NULL!
0000935725	1	1	2	1	6	2011-12-22	T4N2M0	9	0	2	x	4	2	0	2	1	0	49	0	#NULL!	2	2	1	0	0	4	0	3	1	1	#NULL!
0000976410	0	0	2	1	5.66667	2012-06-14	T3N2M0	9	0	2	x	3	2	0	2	2	0	59	0	#NULL!	1	#NULL!	#NULL!	0	0	4	0	3	1	1	#NULL!
0000820347	1	1	1	1	5.2	2010-05-31	T4N2M0	9	0	2	x	4	2	0	2	1	0	54	0	#NULL!	2	1	1	0	0	3	0	3	0	1	#NULL!
0000924960	0	1	2	0	35.4	2011-11-03	T3N0M0	1	1	0	1	3	0	0	2	1	1	57	0	#NULL!	#NULL!	#NULL!	#NULL!	0	0	3	0	3	1	1	#NULL!
0000780823	0	1	2	1	6	2009-11-16	T3N2M0	9	0	2	x	3	2	0	2	1	0	50	1	1	#NULL!	#NULL!	#NULL!	0	0	3	0	3	0	1	#NULL!
0000701385	0	0	1	1	3	2008-09-10	T3N1M1	8	0	2	x	3	1	1	3	1	0	55	0	#NULL!	#NULL!	#NULL!	#NULL!	0	0	3	0	3	0	1	#NULL!
0000787795	0	1	2	1	1.5	2009-12-18	T4N2M1	12	0	2	x	4	2	1	3	1	0	56	0	#NULL!	#NULL!	#NULL!	#NULL!	0	0	2	1	3	1	1	#NULL!
0000960772	1	0	2	1	16	2012-04-17	T3N1M1	9	0	2	x	3	1	1	3	1	0	64	0	#NULL!	#NULL!	#NULL!	#NULL!	1	0	2	1	3	0	0	1
0000792698	1	1	1	1	0.033333	2010-01-21	T4N1M1	9	0	2	x	4	1	1	3	1	0	49	0	#NULL!	1	1	1	0	0	2	0	3	1	0	#NULL!
0000867618	1	0	2	1	1.66667	2011-02-16	T3N2M0	9	0	2	x	3	2	0	3	1	0	66	0	#NULL!	1	1	1	0	0	2	0	3	1	1	#NULL!
0001014498	0	1	2	1	2	2012-11-13	T4N1M0	8	0	2	x	4	1	0	2	2	0	71	0	#NULL!	2	2	1	0	0	2	0	3	1	1	#NULL!
0000919440	0	1	1	1	3	2011-10-12	T4N1M1	8	0	2	x	4	1	1	2	1	0	59	0	#NULL!	2	#NULL!	2	0	0	2	0	3	1	1	#NULL!
0001011278	0	0	2	0	23.3	2012-11-06	T3N0M0	8	0	2	x	3	0	0	2	1	0	69	0	#NULL!	2	2	2	0	0	2	0	3	1	1	#NULL!
0000921332	1	1	1	1	17	2011-10-24	T4N1M0	9	0	2	x	4	1	0	3	1	1	63	0	#NULL!	1	#NULL!	#NULL!	0	0	2	0	3	0	1	1
0000771717	0	1	2	1	20	2009-09-24	T3N0M0	3	1	1	0	3	0	0	2	1	0	54	0	#NULL!	#NULL!	#NULL!	#NULL!	0	0	2	0	3	1	0	#NULL!
0000752209	0	0	2	0	64.1333	2009-06-11	T3N0M0	1	1	0	0	3	0	0	3	1	0	59	1	1	#NULL!	#NULL!	#NULL!	1	1	2	0	3	0	0	#NULL!
0001010271	1	1	2	1	2	2012-10-25	T4N2M0	9	0	2	x	4	2	0	3	1	0	48	0	#NULL!	#NULL!	#NULL!	#NULL!	0	0	2	0	3	1	1	#NULL!
0000783334	0	1	2	1	3	2009-11-23	T4N1M1	9	0	2	x	4	1	1	2	1	0	72	0	#NULL!	#NULL!	#NULL!	#NULL!	0	1	2	0	3	1	1	#NULL!
0001001412	1	0	1	1	3	2012-09-18	T4N2M1	9	0	2	x	3	2	1	2	1	0	41	0	#NULL!	2	1	1	0	0	1	1	3	0	0	#NULL!
0000732639	0	0	2	0	67.4	2009-03-03	T3N1M0	1	1	0	0	3	1	0	3	1	0	51	0	#NULL!	2	2	#NULL!	0	0	1	1	3	0	1	#NULL!
0000741090	1	1	1	1	1	2009-04-13	T4N1M0	9	0	2	x	4	1	0	3	1	0	64	0	#NULL!	2	2	1	0	1	1	0	3	0	0	#NULL!
0000824250	0	0	2	1	12.1667	2010-06-29	T3N2M0	9	0	2	x	3	2	0	2	1	0	69	0	#NULL!	2	2	1	0	0	1	0	3	0	1	#NULL!
0000900905	0	0	2	1	16	2011-07-19	T3N1M0	7	1	0	0	3	1	0	2	1	0	62	0	#NULL!	2	2	1	1	0	1	0	3	0	1	#NULL!
0000900311	0	0	2	1	7	2011-07-19	T3N2M0	8	0	2	x	3	2	0	3	1	0	73	0	#NULL!	#NULL!	2	1	1	0	1	0	3	0	1	#NULL!
0000650759	0	0	1	1	5	2007-12-20	T3N1M1	8	0	2	x	3	1	1	2	1	0	48	0	#NULL!	1	1	2	0	0	1	0	3	0	0	#NULL!
0000762272	0	0	2	1	7	2009-08-03	T3N0M0	1	1	0	0	3	0	0	3	1	0	71	0	#NULL!	2	2	2	0	0	1	0	3	0	1	#NULL!
0001021620	0	1	2	1	10	2012-12-10	T3N2M0	9	0	2	x	3	2	0	3	2	0	62	0	#NULL!	#NULL!	2	2	1	0	1	0	3	1	1	#NULL!
0000878610	1	0	2	0	42.1333	2011-04-11	T3N0M0	3	1	0	1	3	0	0	3	1	0	64	0	#NULL!	#NULL!	#NULL!	#NULL!	0	0	1	0	3	1	1	#NULL!
0000843720	0	1	1	1	2.66667	2010-10-13	T4N1M1	8	0	2	x	4	1	1	2	1	0	62	0	#NULL!	#NULL!	#NULL!	#NULL!	0	0	1	0	3	0	1	#NULL!
0000856030	0	0	1	1	6.66667	2010-12-06	T3N1M1	8	0	2	x	3	1	1	3	1	0	52	1	0	#NULL!	#NULL!	#NULL!	0	0	1	0	3	0	1	#NULL!
0000784250	0	1	1	1	6.66667	2009-12-02	T4N1M0	9	0	2	x	4	1	0	2	1	0	51	0	#NULL!	#NULL!	#NULL!	#NULL!	0	0	#NULL!	1	2	1	1	#NULL!
0000677163	0	0	2	1	5.66667	2008-04-28	T3N1M0	1	1	1	0	3	1	0	2	1	0	64	0	#NULL!	1	2	2	0	0	#NULL!	0	2	0	1	#NULL!
0000676690	0	0	2	0	77.8	2008-04-21	T3N0M0	1	1	0	0	3	0	0	1	1	0	75	0	#NULL!	2	2	2	0	0	#NULL!	0	2	1	1	#NULL!
0000742990	1	0	1	0	65.7	2009-04-24	T3N0M0	1	1	0	0	3	0	0	1	1	0	60	1	0	#NULL!	#NULL!	#NULL!	0	0	#NULL!	0	2	1	1	0
0000755769	1	0	2	0	63.5	2009-06-30	T3N0M0	9	0	2	x	3	0	0	1	1	0	78	1	0	#NULL!	#NULL!	#NULL!	0	0	#NULL!	0	2	1	1	#NULL!
0000670015	0	0	2	0	79.1	2008-03-12	T3N0M0	8	0	2	x	3	0	0	3	1	0	56	1	0	#NULL!	#NULL!	#NULL!	0	0	#NULL!	0	2	1	0	#NULL!
0001005583	0	1	1	1	11	2012-10-31	T4N1M0	5	1	0	1	4	1	0	2	1	1	67	0	#NULL!	2	2	1	0	1	4	1	2	0	1	#NULL!
0000822060	1	0	2	0	52.3667	2010-06-04	T3N0M0	9	0	2	x	3	0	0	1	1	0	68	1	0	2	2	1	0	0	4	1	2	1	1	#NULL!
0000932957	0	1	1	1	1.33333	2011-12-08	T4N2M1	8	0	2	x	4	2	1	3	1	0	79	0	#NULL!	1	#NULL!	2	0	0	4	1	2	1	1	#NULL!
0000994976	0	0	1	1	1	2012-08-21	T3N2M1	8	0	2	x	3	2	1	3	1	0	62	0	#NULL!	#NULL!	#NULL!	#NULL!	0	0	4	1	2	0	0	#NULL!
0000869815	0	1	2	0	43.7333	2011-02-23	T3N0M0	4	1	0	1	3	0	0	2	2	1	65	0	#NULL!	1	2	1	0	1	4	0	2	1	1	#NULL!
0000863443	0	0	1	0	44.9	2011-01-18	T3N1M0	1	1	0	0	3	1	0	3	1	0	75	0	#NULL!	1	2	2	0	0	4	0	2	1	1	#NULL!
0000826802	0	0	1	0	51	2010-07-15	T3N0M0	1	1	0	0	3	0	0	2	1	0	65	0	#NULL!	2	2	2	0	0	4	0	2	1	1	#NULL!
0000812411	0	1	2	1	1	2010-04-26	T3N2M1	8	0	2	x	3	2	1	3	2	0	59	0	#NULL!	2	#NULL!	2	1	0	4	0	2	1	1	#NULL!
0000834138	0	1	2	1	2	2010-08-17	T3N1M1	8	0	2	x	3	1	1	3	2	0	65	0	#NULL!	2	#NULL!	2	0	0	4	0	2	1	1	1
0000961174	0	1	1	0	30.2	2012-04-09	T3N0M0	2	1	0	1	3	0	0	3	1	0	56	0	#NULL!	1	#NULL!	#NULL!	1	0	4	0	2	1	1	#NULL!
0000870277	0	0	1	1	24	2011-02-24	T3N0M0	7	1	0	0	3	0	0	3	1	0	65	0	#NULL!	2	#NULL!	#NULL!	0	1	4	0	2	0	1	#NULL!
0000757124	0	0	1	0	63.4333	2009-07-02	T3N0M0	2	1	0	0	3	0	0	2	1	0	74	0	#NULL!	#NULL!	#NULL!	#NULL!	0	0	4	0	2	0	1	#NULL!
0000745733	0	0	2	1	2.66667	2009-05-11	T3N2M0	2	1	1	0	3	2	0	3	1	0	49	0	#NULL!	#NULL!	#NULL!	#NULL!	0	0	4	0	2	1	0	#NULL!
0000755833	1	0	1	0	63.5	2009-06-30	T3N0M0	7	1	0	0	3	0	0	2	1	0	55	0	#NULL!	#NULL!	#NULL!	#NULL!	1	0	4	0	2	1	1	#NULL!
0000974557	0	0	2	0	28.6667	2012-05-25	T3N0M0	4	1	0	0	3	0	0	3	1	0	73	0	#NULL!	#NULL!	#NULL!	#NULL!	0	0	4	0	2	0	0	#NULL!
0000776900	0	0	2	1	7	2009-10-23	T3N2M0	8	0	2	x	3	2	0	2	1	0	76	0	#NULL!	#NULL!	#NULL!	#NULL!	1	0	3	1	2	1	1	#NULL!
0000820046	0	0	2	1	1	2010-06-10	T3N1M1	9	0	2	x	3	1	1	3	1	0	76	0	#NULL!	1	1	1	0	0	3	0	2	0	1	#NULL!
0010005499	1	1	1	0	23.6667	2012-10-25	T3N2M0	4	1	0	1	3	2	0	2	1	1	59	0	#NULL!	1	1	1	0	0	3	0	2	0	0	#NULL!
0000889441	0	1	1	0	40.7333	2011-05-23	T3N0M0	1	1	0	0	3	0	0	2	1	0	68	0	#NULL!	2	#NULL!	#NULL!	1	0	3	0	2	0	1	#NULL!
0000662292	0	0	2	1	6.9	2008-01-30	T3N1M0	4	1	0	0	3	1	0	3	1	0	70	0	#NULL!	#NULL!	#NULL!	#NULL!	1	0	3	0	2	1	1	1
0000786949	0	0	1	1	5	2009-12-24	T3N1M0	1	1	1	0	3	1	0	2	1	0	71	0	#NULL!	#NULL!	#NULL!	#NULL!	0	0	3	0	2	1	1	#NULL!
0000802001	0	0	2	0	55.2333	2010-03-08	T3N0M0	1	1	0	0	3	0	0	1	1	0	65	1	0	#NULL!	#NULL!	#NULL!	0	0	3	0	2	0	1	#NULL!
0000661058	1	1	2	1	9	2008-01-17	T4N0M0	9	0	2	x	4	0	0	1	2	0	49	0	#NULL!	#NULL!	#NULL!	#NULL!	1	1	3	0	2	1	0	#NULL!
0000976486	1	0	2	1	2	2012-06-08	T3N2M0	9	0	2	x	3	2	0	3	1	0	65	0	#NULL!	1	1	1	0	0	2	1	2	1	1	#NULL!
0000818827	1	1	2	1	2	2010-05-24	T3N1M0	7	1	0	1	3	1	0	2	1	1	70	0	#NULL!	2	1	1	0	0	2	1	2	0	0	#NULL!
0000849032	0	0	2	1	1.2	2010-11-10	T3N1M1	10	0	2	x	3	1	1	3	1	1	60	0	#NULL!	1	1	2	1	0	2	1	2	1	1	#NULL!
0001009699	0	1	2	1	0.666667	2012-10-22	T3N2M0	4	1	0	0	3	2	0	3	1	0	60	0	#NULL!	2	2	2	0	0	2	1	2	1	1	#NULL!
0000793842	0	1	2	1	3	2010-01-26	T3N2M0	2	1	1	0	3	2	0	2	1	0	63	0	#NULL!	1	1	1	0	0	2	0	2	0	0	#NULL!
0000826025	0	1	2	0	51.4667	2010-07-01	T4N2M1	9	0	2	x	4	2	1	3	1	0	57	0	#NULL!	1	1	1	0	0	2	0	2	1	1	1
0000873496	1	1	2	1	2	2011-03-15	T4N1M0	9	0	2	x	4	1	0	2	1	0	68	0	#NULL!	1	2	1	0	0	2	0	2	1	1	#NULL!
0000722275	0	1	2	1	12.1667	2009-01-04	T4N1M0	5	1	0	1	4	1	0	2	2	0	65	0	#NULL!	2	1	1	0	0	2	0	2	0	1	#NULL!
0000740189	0	1	1	1	5	2009-04-14	T3N2M0	2	1	0	1	3	2	0	2	1	0	64	0	#NULL!	2	2	1	1	0	2	0	2	0	0	#NULL!
0001030589	0	1	2	1	1.66667	2013-01-05	T3N1M1	8	0	2	x	3	1	1	3	1	0	55	0	#NULL!	#NULL!	2	1	0	0	2	0	2	1	0	#NULL!
0000980902	0	0	2	1	4.33333	2009-07-03	T3N2M0	4	1	1	0	3	2	0	3	1	0	60	0	#NULL!	1	1	2	0	0	2	0	2	1	0	#NULL!
0000672852	0	1	1	1	2	2008-03-27	T4N1M1	9	0	2	x	4	1	1	2	1	0	61	0	#NULL!	2	2	2	0	0	2	0	2	1	0	#NULL!
0000929792	1	1	2	1	6.33333	2011-12-06	T4N1M0	9	0	2	x	4	1	0	3	1	0	48	0	#NULL!	2	2	2	0	0	2	0	2	1	1	#NULL!
0000928337	1	1	2	1	4	2011-11-21	T4N1M0	9	0	2	x	4	1	0	2	1	0	74	0	#NULL!	2	#NULL!	#NULL!	0	0	2	0	2	0	1	#NULL!
0000673122	0	0	2	0	78.4	2008-04-03	T3N0M0	1	1	0	1	3	0	0	2	1	0	65	0	#NULL!	#NULL!	#NULL!	#NULL!	0	1	2	0	2	1	0	#NULL!
0000773349	1	0	2	1	2	2009-09-27	T3N2M1	9	0	2	x	3	2	1	2	1	0	66	0	#NULL!	#NULL!	#NULL!	#NULL!	0	0	2	0	2	1	1	#NULL!
0000730070	0	0	2	1	3.66667	2009-02-23	T3N2M0	9	0	2	x	3	2	0	2	1	0	56	0	#NULL!	#NULL!	#NULL!	#NULL!	1	0	2	0	2	1	1	#NULL!
0000748922	0	0	2	0	64.6667	2009-05-25	T3N0M0	8	0	2	x	3	0	0	2	1	0	67	0	#NULL!	#NULL!	#NULL!	#NULL!	1	0	2	0	2	1	1	#NULL!
0000725026	1	0	2	1	3	2009-01-19	T3N2M1	9	0	2	x	3	2	1	3	1	0	65	0	#NULL!	2	1	1	1	1	1	1	2	1	1	#NULL!
0000724122	0	1	2	1	1.66667	2009-01-13	T4N2M0	9	0	2	x	4	2	0	3	2	0	61	0	#NULL!	2	1	1	0	0	1	0	2	1	1	#NULL!
0000980854	0	0	1	0	27.5333	2012-06-29	T3N0M0	1	1	0	0	3	0	0	2	1	0	65	0	#NULL!	2	2	2	0	0	1	0	2	1	1	#NULL!
0000898802	0	0	2	0	39.3333	2011-07-05	T3N0M0	3	1	0	0	3	0	0	3	1	0	52	0	#NULL!	2	#NULL!	#NULL!	0	0	1	0	2	1	1	#NULL!
0000743416	0	1	1	1	8	2009-04-27	T3N2M0	9	0	2	x	3	2	0	3	1	0	50	0	#NULL!	#NULL!	#NULL!	#NULL!	0	0	1	0	2	0	1	#NULL!
0000967632	0	1	1	1	7.23333	2012-05-04	T3N1M1	9	0	2	x	3	1	1	2	1	0	58	0	#NULL!	#NULL!	#NULL!	#NULL!	0	0	1	0	2	0	1	#NULL!
0000693688	0	0	2	1	3	2008-07-24	T3N2M1	8	0	2	x	3	2	1	2	2	0	76	0	#NULL!	2	1	2	0	0	#NULL!	1	1	1	0	#NULL!
0000795164	0	0	2	0	57.8	2009-12-21	T3N0M0	1	1	0	0	3	0	0	1	1	0	64	0	#NULL!	2	2	2	0	0	#NULL!	0	1	0	0	#NULL!
0000662754	0	0	1	0	80.4667	2008-02-01	T3N0M0	8	0	2	x	3	0	0	2	1	0	59	0	#NULL!	#NULL!	#NULL!	#NULL!	0	0	#NULL!	0	1	1	0	#NULL!
0000621113	0	1	2	1	3	2007-01-21	T4N2M0	8	0	2	x	4	2	0	3	2	0	58	0	#NULL!	#NULL!	#NULL!	#NULL!	0	0	#NULL!	0	1	0	0	1
0000762387	0	0	2	0	62.5	2009-07-31	T3N0M0	8	0	2	x	3	0	0	2	1	0	79	0	#NULL!	#NULL!	#NULL!	#NULL!	1	0	#NULL!	0	1	0	1	#NULL!
0000719465	0	0	2	0	69.8667	2008-12-19	T3N0M0	8	0	2	x	3	0	0	1	1	0	57	0	#NULL!	#NULL!	#NULL!	#NULL!	0	0	#NULL!	0	1	1	1	#NULL!
0001025649	0	0	2	1	6	2012-12-28	T3N1M0	1	1	0	0	3	1	0	2	1	0	64	0	#NULL!	2	2	1	1	0	4	1	1	1	1	#NULL!
0000800905	0	1	2	0	55.4667	2010-03-01	T3N0M0	1	1	0	0	3	0	0	1	2	0	61	0	#NULL!	2	1	2	0	0	4	1	1	1	0	#NULL!
0000974702	0	1	2	1	1	2012-06-07	T4N2M1	13	0	2	x	4	2	1	3	1	0	56	0	#NULL!	#NULL!	#NULL!	#NULL!	0	0	4	1	1	1	0	1
0000720614	1	1	2	1	4	2008-12-23	T4N1M0	9	0	2	x	4	1	0	2	1	0	55	0	#NULL!	#NULL!	#NULL!	#NULL!	0	0	4	1	1	0	1	1
0000843266	0	1	2	1	1	2010-10-19	T3N2M1	8	0	2	x	3	2	1	3	1	0	59	0	#NULL!	1	2	1	0	0	4	0	1	1	1	#NULL!
0000738808	0	1	2	0	66.4667	2009-03-31	T3N0M0	1	1	0	0	3	0	0	3	1	0	39	0	#NULL!	2	2	1	0	0	4	0	1	0	1	#NULL!
0000861279	1	1	1	1	5	2011-01-06	T3N1M1	9	0	2	x	3	1	1	2	1	0	39	0	#NULL!	#NULL!	2	1	0	0	4	0	1	1	1	#NULL!
0000732571	0	1	1	1	3	2009-03-03	T4N2M0	9	0	2	x	4	2	0	3	2	0	68	0	#NULL!	2	2	2	0	0	4	0	1	1	1	#NULL!
0000918508	1	0	2	1	1.33333	2011-10-11	T3N1M1	9	0	2	x	3	1	1	3	1	0	72	0	#NULL!	1	#NULL!	#NULL!	0	0	4	0	1	1	0	#NULL!
0000785588	0	0	2	1	3.66667	2008-12-07	T3N0M0	3	1	1	0	3	0	0	1	1	0	61	1	1	#NULL!	#NULL!	#NULL!	0	0	4	0	1	0	1	#NULL!
0000818272	0	1	2	1	1	2010-05-26	T4N2M1	8	0	2	x	4	2	1	3	1	0	70	0	#NULL!	#NULL!	#NULL!	#NULL!	0	1	3	1	1	0	1	#NULL!
0000953626	0	0	2	1	4	2012-03-08	T3N1M0	1	1	0	1	3	1	0	3	1	0	54	0	#NULL!	1	2	1	0	0	3	0	1	0	1	#NULL!
0000843013	1	1	2	1	3.33333	2010-10-08	T4N1M0	9	0	2	x	4	1	0	3	2	0	61	0	#NULL!	1	#NULL!	1	0	0	3	0	1	1	0	#NULL!
0001015639	0	0	2	0	23.2	2012-11-09	T3N0M0	3	1	0	1	3	0	0	3	2	0	46	0	#NULL!	2	2	2	0	0	3	0	1	0	1	#NULL!
0000895483	1	1	1	0	39.7667	2011-06-22	T3N1M0	3	1	0	0	3	1	0	2	1	0	54	0	#NULL!	2	#NULL!	#NULL!	1	0	3	0	1	0	0	#NULL!
0001015212	1	0	1	0	23.1667	2012-11-10	T3N0M0	3	1	0	0	3	0	0	3	1	0	71	0	#NULL!	#NULL!	#NULL!	#NULL!	0	0	3	0	1	0	0	#NULL!
0000792901	1	0	2	1	5	2010-01-20	T3N0M0	9	0	2	x	3	0	0	1	2	0	82	1	0	#NULL!	#NULL!	#NULL!	1	0	3	0	1	1	1	#NULL!
0000733805	0	1	2	1	14	2009-03-16	T4N1M0	8	0	2	x	4	1	0	3	1	0	58	0	#NULL!	1	2	1	0	0	2	1	1	1	1	#NULL!
0000733643	0	1	2	1	6	2009-03-11	T3N2M0	4	1	0	1	3	2	0	2	2	0	49	0	#NULL!	1	1	2	0	0	2	1	1	0	1	#NULL!
0000702310	0	0	2	1	5.33333	2008-09-18	T3N2M0	2	1	1	0	3	2	0	3	1	0	56	1	1	2	2	2	1	0	2	1	1	1	1	#NULL!
0000697945	1	0	2	1	1	2008-08-27	T3N2M0	9	0	2	x	3	2	0	2	1	0	45	0	#NULL!	#NULL!	#NULL!	#NULL!	0	0	2	1	1	0	0	#NULL!
0000761572	0	0	2	1	10	2009-07-30	T3N2M0	8	0	2	x	3	2	0	2	1	0	68	0	#NULL!	#NULL!	#NULL!	#NULL!	1	0	2	1	1	0	1	#NULL!
0000763448	0	1	2	1	3	2009-08-03	T3N1M1	8	0	2	x	3	1	1	2	1	0	52	0	#NULL!	#NULL!	#NULL!	#NULL!	0	0	2	1	1	0	1	#NULL!
0001027235	0	1	2	1	4	2012-12-18	T4N1M0	10	0	2	x	4	1	0	2	1	0	86	0	#NULL!	1	1	1	0	0	2	0	1	0	0	#NULL!
0001020340	0	1	1	1	4.66667	2012-12-21	T4N2M1	9	0	2	x	4	2	1	3	1	1	54	0	#NULL!	1	1	1	0	0	2	0	1	1	1	#NULL!
0000691266	0	1	2	1	6	2008-07-10	T4N1M0	9	0	2	x	4	1	0	3	1	0	42	0	#NULL!	1	2	1	0	0	2	0	1	1	1	#NULL!
0000846983	0	0	2	0	47.6333	2010-10-26	T3N0M0	4	1	0	0	3	0	0	2	1	0	58	0	#NULL!	2	2	1	0	0	2	0	1	1	1	#NULL!
0000875785	1	0	1	1	5.46667	2008-03-25	T3N1M0	1	1	1	0	3	1	0	2	1	0	83	0	#NULL!	2	1	1	1	0	2	0	1	1	1	#NULL!
0000805534	0	0	2	0	54.6333	2010-03-26	T3N0M0	1	1	0	0	3	0	0	2	1	0	61	0	#NULL!	2	#NULL!	1	0	0	2	0	1	1	1	#NULL!
0000704799	1	1	1	1	12	2008-09-24	T3N1M1	9	0	2	x	3	1	1	3	1	0	69	0	#NULL!	2	2	1	0	0	2	0	1	0	1	#NULL!
0000924132	1	1	2	1	0.9	2011-11-01	T4N2M0	9	0	2	x	4	2	0	3	1	0	77	0	#NULL!	#NULL!	1	1	0	0	2	0	1	1	1	#NULL!
0000736509	0	0	1	0	66.7	2009-03-24	T3N1M0	1	1	0	1	3	1	0	3	1	0	62	0	#NULL!	1	2	2	0	0	2	0	1	0	1	#NULL!
0000960853	0	0	1	0	29.9667	2012-04-16	T3N0M0	3	1	0	0	3	0	0	2	1	0	67	0	#NULL!	2	2	2	0	0	2	0	1	1	1	#NULL!
0000987910	0	0	1	1	2	2012-07-26	T3N1M0	1	1	0	0	3	1	0	3	1	0	39	0	#NULL!	2	2	2	0	0	2	0	1	1	1	#NULL!
0000832508	0	0	2	0	50.3333	2010-08-05	T3N0M0	1	1	0	1	3	0	0	2	1	0	68	0	#NULL!	2	2	2	0	0	2	0	1	0	1	#NULL!
0000937409	0	1	2	1	7.33333	2012-01-05	T3N0M0	8	0	2	x	3	0	0	2	1	0	71	1	1	2	2	2	0	0	2	0	1	0	0	#NULL!
0000789881	0	0	2	1	24	2009-12-31	T3N1M0	7	1	0	0	3	1	0	3	1	0	44	0	#NULL!	2	2	2	0	1	2	0	1	0	1	#NULL!
0000875679	0	0	2	0	42.7	2011-03-24	T3N0M0	3	1	0	0	3	0	0	2	1	0	69	0	#NULL!	2	#NULL!	#NULL!	0	0	2	0	1	1	1	#NULL!
0000789783	0	0	2	0	57.5	2009-12-30	T3N0M0	3	1	0	0	3	0	0	2	1	0	46	1	1	#NULL!	#NULL!	#NULL!	0	0	2	0	1	1	1	#NULL!
0000690558	0	1	1	0	75.2	2008-07-09	T3N1M0	2	1	0	1	3	1	0	3	1	0	65	0	#NULL!	#NULL!	#NULL!	#NULL!	0	0	2	0	1	1	1	#NULL!
0000805658	0	0	2	1	2	2009-03-23	T3N2M0	2	1	1	0	3	2	0	3	1	0	53	0	#NULL!	#NULL!	#NULL!	#NULL!	0	1	2	0	1	1	1	#NULL!
0000805570	0	0	2	0	54.7333	2010-03-23	T3N0M0	1	1	0	0	3	0	0	2	1	0	29	0	#NULL!	#NULL!	#NULL!	#NULL!	0	0	2	0	1	1	0	#NULL!
0000771823	0	1	1	1	3	2009-09-21	T4N2M0	9	0	2	x	4	2	0	2	1	0	63	0	#NULL!	#NULL!	#NULL!	#NULL!	0	0	2	0	1	0	1	#NULL!
0000791514	1	0	2	0	57.1333	2010-01-11	T3N0M0	9	0	2	x	3	0	0	2	1	0	76	1	0	#NULL!	#NULL!	#NULL!	1	0	2	0	1	1	0	#NULL!
0000977614	1	1	2	1	2	2012-06-26	T4N1M0	9	0	2	x	4	1	0	3	2	0	86	0	#NULL!	#NULL!	1	1	1	0	1	1	1	0	0	#NULL!
0000888585	0	0	2	1	12.1667	2011-05-20	T3N2M0	4	1	0	0	3	2	0	3	1	0	53	0	#NULL!	2	1	1	0	0	1	0	1	1	0	#NULL!
0000790116	0	1	1	1	7	2009-12-30	T3N2M0	8	0	2	x	3	2	0	2	2	0	65	0	#NULL!	2	1	1	0	0	1	0	1	1	0	#NULL!
0000941160	0	1	1	1	5	2012-01-20	T3N2M0	4	1	0	1	3	2	0	2	1	0	66	1	1	#NULL!	1	1	0	1	1	0	1	1	1	#NULL!
0000796832	1	1	2	1	1.66667	2010-01-21	T4N1M1	11	0	2	x	4	1	1	2	2	0	71	0	#NULL!	1	1	2	0	0	1	0	1	1	0	#NULL!
0000964679	0	0	2	1	11	2012-04-27	T3N0M0	7	1	0	0	3	0	0	2	1	0	62	0	#NULL!	1	2	2	0	0	1	0	1	1	1	#NULL!
0000987968	0	1	2	0	26.5	2012-07-31	T3N0M0	3	1	0	0	3	0	0	3	2	0	58	0	#NULL!	2	#NULL!	2	1	0	1	0	1	0	1	#NULL!
0000842070	0	0	2	0	48.6333	2010-09-26	T3N0M0	2	1	0	0	3	0	0	2	1	0	59	0	#NULL!	2	2	2	0	0	1	0	1	0	1	#NULL!
0000882620	0	0	2	1	6	2009-04-28	T3N2M0	4	1	1	0	3	2	0	2	1	0	69	0	#NULL!	1	#NULL!	#NULL!	0	0	1	0	1	1	1	#NULL!
0000825306	0	0	2	0	51.4667	2010-07-01	T3N0M0	2	1	0	0	3	0	0	3	1	0	42	0	#NULL!	2	#NULL!	#NULL!	0	0	1	0	1	0	1	#NULL!
0001027071	0	1	2	0	21.8667	2012-12-19	T4N2M0	5	1	0	1	4	2	0	2	2	0	61	0	#NULL!	#NULL!	#NULL!	#NULL!	0	0	1	0	1	0	1	#NULL!
0000975033	0	0	1	0	28.5	2012-05-30	T3N0M0	3	1	0	0	3	0	0	3	1	0	41	1	0	#NULL!	#NULL!	#NULL!	0	0	1	0	1	0	1	#NULL!
0000797761	0	0	1	1	13	2008-01-29	T3N0M0	3	1	1	0	3	0	0	2	1	0	74	1	0	#NULL!	#NULL!	#NULL!	0	0	1	0	1	0	1	#NULL!
0000661681	1	1	1	1	15	2008-01-25	T3N0M0	1	1	0	0	3	0	0	2	1	0	64	0	#NULL!	#NULL!	#NULL!	#NULL!	0	0	1	0	1	1	1	#NULL!
0000853379	0	0	2	1	5.33333	2010-12-01	T3N1M0	1	1	0	0	3	1	0	3	1	1	67	0	#NULL!	#NULL!	#NULL!	#NULL!	0	0	1	0	1	1	1	#NULL!
0000756351	0	1	1	1	10	2009-07-07	T4N1M0	9	0	2	x	4	1	0	3	1	0	66	0	#NULL!	#NULL!	#NULL!	#NULL!	0	0	1	0	1	0	1	1
0000894405	0	1	2	1	2	2011-06-17	T4N1M0	9	0	2	x	4	1	0	3	1	0	76	0	#NULL!	#NULL!	#NULL!	#NULL!	0	1	1	0	1	1	1	#NULL!
0000777059	1	0	2	1	10	2009-10-21	T3N2M0	9	0	2	x	3	2	0	3	2	0	43	0	#NULL!	#NULL!	#NULL!	#NULL!	1	0	1	0	1	1	0	#NULL!

## Sheet: assignment
surgery method：1. cholecystectomy, wedge resection and regional LN dissection 2.cholecystectomy, wedge resection and extended LN dissection 3. cholecystectomy, segmentectomy IVb/V and regional LN dissection 4. cholecystectomy, segmentectomy IVb/V and extended LN dissection 5.HPD 6.cholecystectomy, wedge resection, regional lymph node dissection and subtotal gastrectomy 7.major hepatectomy, cholec…
survival state：1=dead， 0=living
sex： 1=male，2=female
pathological type：1=Adenocarcinoma， 2=Non-adenocarcinoma
intraoperative blood loss：1=<1000ml, 2≥1000ml
CEA、CA125、CA199:1=postive， 2=negative
Blood type：1=A， 2=B, 3=AB, 4=O
tumor location:1=Bottom, 2=Body,3=Neck,4=Bottom and body,5=Cystic duct,6=Neck and body
